# Supplementary material
Source: ML conference proceedings conference paper supplement (https://proceedings.mlr.press/v48/mussmann16.html)
Supplement: Supplementary file [file mussmann16-supp.pdf]

## 6. Appendix

### 6.1. Proofs of Theorems 3.3 and 3.4

**Theorem 3.3.** For an approximate MIPS method with additive error  $c > 0$ , let the inverse partition function estimate using Gumbels and exact MIPS be  $\hat{Z}^{-1}$  and the estimate with approximate MIPS be  $\tilde{Z}^{-1}$ . Then,

$$\hat{Z}^{-1} \leq \tilde{Z}^{-1} \leq e^c \hat{Z}^{-1}$$

*Proof.* Let  $H$  be defined as before and let  $\hat{H}$  be the corresponding value with the approximate method. Since the approximate method has additive error  $c$ ,

$$H - c \leq \hat{H} \leq H$$

$$e^c e^{-H} \geq e^{-\hat{H}} \geq e^{-H}$$

Using the notation from the theorem statement,  $\hat{Z}^{-1} = e^{-H}$  and  $\tilde{Z}^{-1} = e^{-\hat{H}}$ . Thus,

$$e^c \hat{Z}^{-1} \geq \tilde{Z}^{-1} \geq \hat{Z}^{-1}$$

□

**Theorem 3.4.** For an approximate MIPS method with additive error  $c > 0$ , let the sample with the approximate MIPS be  $\tilde{i}$ . Then,

$$e^{-c} P_\theta(x_k) \leq P(\tilde{i} = k) \leq e^c P_\theta(x_k)$$

*Proof.* Let  $\tilde{i}$  be the maximum from the approximate MIPS. For convenience, let  $a_i = \theta \cdot \phi(x_i)$ . Let  $G_i$  be the corresponding Gumbel variables. Note that,

$$P_\theta(x_k) = P(k = \operatorname{argmax}_j a_j + G_j)$$

$$P_\theta(x_k) = P(a_k + G_k > \max_{j \neq k} a_j + G_j)$$

Let us examine the probability of sampling a particular  $k$  with the approximate MIPS method.

$$P(\tilde{i} = k) \leq P(\max_{j \neq k} a_j + G_j - c < a_k + G_k)$$

$$P(\tilde{i} = k) \geq P(\max_{j \neq k} a_j + G_j < a_k + G_k - c)$$

The maximum has a distribution of  $\log(Z - e^{a_k}) + G'$  where  $G'$  has a Gumbel distribution.

$$P(\tilde{i} = k) \leq P(\log(Z - e^{a_k}) + G' - c < a_k + G_k)$$

$$P(\tilde{i} = k) \geq P(\log(Z - e^{a_k}) + G' < a_k + G_k - c)$$

Rearranging terms,

$$P(\tilde{i} = k) \leq P(G' - G_k < a_k - \log(Z - e^{a_k}) + c)$$

$$P(\tilde{i} = k) \geq P(G' - G_k < a_k - \log(Z - e^{a_k}) - c)$$

Since the difference of two Gumbel distributions is a logistic distribution,

$$P(\tilde{i} = k) \leq \frac{1}{1 + e^{-(a_k - \log(Z - e^{a_k}) + c)}}$$

$$P(\tilde{i} = k) \geq \frac{1}{1 + e^{-(a_k - \log(Z - e^{a_k}) - c)}}$$

And thus,

$$e^{-c} \frac{e^{a_k}}{Z} \leq P(\tilde{i} = k) \leq e^c \frac{e^{a_k}}{Z}$$

$$e^{-c} P_\theta(x_k) \leq P(\tilde{i} = k) \leq e^c P_\theta(x_k)$$

□

## 6.2. Tables

Here we present some tables from the experimental results section. The tables with the probabilities without model averaging for the states that were presented in Section 4.2 are shown as Table 3 and 4. The probabilities of the words generally make sense given that the model is a bag-of-words-like model. The "point.b" may appear odd at first, but is often used in conjunction with flights as in the context of the phrase "from point A to point B".

The words used to train the basketball category in Section 4.3 can be seen in Table 5. The top 50 words for the generative models learned by the four different methods mentioned in Section 4.3 can be seen in Table 6 and 7. The training words appear in black, the other basketball-related words appear in blue, and the non-basketball-related words appear in red. The non-basketball-related words are counted as mistakes.

For the HSKM method, we used  $p = 100$  as a beam size and  $b = 10$  as a branching factor. We also used  $k = 1$  and  $t = 100$ .

| Order | Probability |
|-------|-------------|
| 1     | 0.5122      |
| 2     | 0.05799     |
| 3     | 0.02643     |
| 10    | 0.01056     |
| 100   | 6.632e-4    |
| 1000  | 1.6336e-5   |

Table 3. Probabilities (without using model averaging) used for synthetic model averaging inference

| Basketball-related Words |
|--------------------------|
| hoop                     |
| shoot                    |
| basket                   |
| dribble                  |
| pass                     |
| three_pointer            |
| key                      |
| sideline                 |
| bench                    |
| court                    |
| coach                    |
| player                   |
| center                   |
| guard                    |

Table 5. The basketball-related words used for training the basketball category for the gradient descent experiment

| Order  | Word                     | Probability |
|--------|--------------------------|-------------|
| 1      | point.b                  | 2.8917e-5   |
| 2      | stresses                 | 2.0855e-5   |
| 3      | turbulence               | 2.0143e-5   |
| 4      | ordeal                   | 1.8597e-5   |
| 5      | stress                   | 1.7599e-5   |
| 10     | important_thing          | 1.5307e-5   |
| 100    | formal_training          | 1.0142e-5   |
| 1000   | gabby's_seat             | 6.7475e-6   |
| 10000  | garamba                  | 4.2853e-6   |
| 100000 | joe_hart_vincent_kompany | 2.3600e-6   |

Table 4. Words and probabilities (without using model averaging) for word2vec model averaging inference

Learning and Inference via Maximum Inner Product Search

| Rank | Exact Method      | MRG: Exact MIPS   |
|------|-------------------|-------------------|
| 1    | bench             | sideline          |
| 2    | sideline          | dribble           |
| 3    | dribble           | bench             |
| 4    | guard             | hoop              |
| 5    | hoop              | ball              |
| 6    | three_pointer     | three_pointer     |
| 7    | ball              | guard             |
| 8    | basket            | basket            |
| 9    | layup             | loose_ball        |
| 10   | defender          | layup             |
| 11   | loose_ball        | timeout           |
| 12   | teammate          | defender          |
| 13   | shot_clock        | shot_clock        |
| 14   | jump_shot         | pointer           |
| 15   | pointer           | jump_shot         |
| 16   | coach             | an_ncaa_college   |
| 17   | timeout           | teammate          |
| 18   | dribbling         | coach             |
| 19   | with_seconds_left | free_throw        |
| 20   | player            | dribbling         |
| 21   | free_throw        | scrimmage         |
| 22   | scrimmage         | player            |
| 23   | an_ncaa_college   | shoot             |
| 24   | shoot             | with_seconds_left |
| 25   | teammates         | buzzer            |
| 26   | receiver          | teammates         |
| 27   | shooting_guard    | receiver          |
| 28   | pass              | pass              |
| 29   | fast_break        | dribbled          |
| 30   | point_guard       | shooting_guard    |
| 31   | buzzer            | fast_break        |
| 32   | yard_line         | yard_line         |
| 33   | dribbled          | midcourt          |
| 34   | defenders         | point_guard       |
| 35   | midfield          | referee           |
| 36   | free_throws       | an_nba_basketball |
| 37   | an_nba_basketball | defenders         |
| 38   | assistant_coach   | quickness         |
| 39   | referee           | free_throws       |
| 40   | midcourt          | perimeter         |
| 41   | locker_room       | griner            |
| 42   | perimeter         | midfield          |
| 43   | quickness         | locker_room       |
| 44   | griner            | inbounds_pass     |
| 45   | scoring           | assistant_coach   |
| 46   | playmaker         | jump_shots        |
| 47   | court             | basketball        |
| 48   | playmaking        | court             |
| 49   | jump_shots        | inbounded         |
| 50   | inbounds_pass     | forward           |

Table 6. Top 50 words according to models learned by gradient descent with exact method and with our Gumbel reduction using exact MIPS. The training words are black, basketball-related words are blue, and non-basketball-related words are red.

| Rank | MRG: HSKM MIPS         | Mean Heuristic         |
|------|------------------------|------------------------|
| 1    | layup                  | layup                  |
| 2    | three_pointer          | pointer                |
| 3    | pointer                | three_pointer          |
| 4    | ball                   | ball                   |
| 5    | loose_ball             | loose_ball             |
| 6    | free_throws            | free_throws            |
| 7    | free_throw             | end_zone               |
| 8    | jump_shot              | with_seconds_left      |
| 9    | two_free_throws        | yard_touchdown         |
| 10   | fast_break             | free_throw             |
| 11   | with_seconds_left      | two_free_throws        |
| 12   | shot_clock             | an_ncaa_college        |
| 13   | timeout                | puck                   |
| 14   | puck                   | jump_shot              |
| 15   | dribble                | dunk                   |
| 16   | dunk                   | timeout                |
| 17   | basket                 | yard_line              |
| 18   | dunks                  | field_goal             |
| 19   | layups                 | yard_field_goal        |
| 20   | end_zone               | fast_break             |
| 21   | penalty_area           | an_alley_oop           |
| 22   | an_alley_oop           | bench                  |
| 23   | three_pointers         | sideline               |
| 24   | yard_touchdown         | yard_touchdown_pass    |
| 25   | jumper                 | three_pointers         |
| 26   | driving_layup          | basket                 |
| 27   | midfield               | th_minute              |
| 28   | bench                  | penalty_area           |
| 29   | field_goal             | dunks                  |
| 30   | backboard              | midfield               |
| 31   | reverse_layup          | scrimmage              |
| 32   | yard_line              | dribble                |
| 33   | technical_foul         | shot_clock             |
| 34   | sideline               | jumper                 |
| 35   | free_throw_line        | touchdown              |
| 36   | dribbled               | technical_foul         |
| 37   | buzzer                 | yard_gain              |
| 38   | scrimmage              | yard_pass              |
| 39   | an_ncaa_college        | layups                 |
| 40   | midcourt               | driving_layup          |
| 41   | foul                   | final_seconds          |
| 42   | ump_shots              | with_seconds_remaining |
| 43   | an_offensive_rebound   | reverse_layup          |
| 44   | th_minute              | teammate               |
| 45   | with_seconds_remaining | free_throw_line        |
| 46   | short_jumper           | dribbled               |
| 47   | point_guard            | an_nba_basketball      |
| 48   | fouls                  | midcourt               |
| 49   | foul_line              | yard_run               |
| 50   | teammates              | teammates              |

Table 7. Top 50 words according to models learned by gradient descent with our Gumbel reduction using HSKM and with the mean heuristic. The training words are black, basketball-related words are blue, and non-basketball-related words are red.
